# Supplementary material
Source: PubMed Central journal article supplement (PMC4550377)
Supplement: supp_fj.15-271510_Supplemental_Figure1.pdf [file supp_fj.15-271510_Supplemental_Figure1.pdf]

Ting et al.  
Supplemental Figure 1

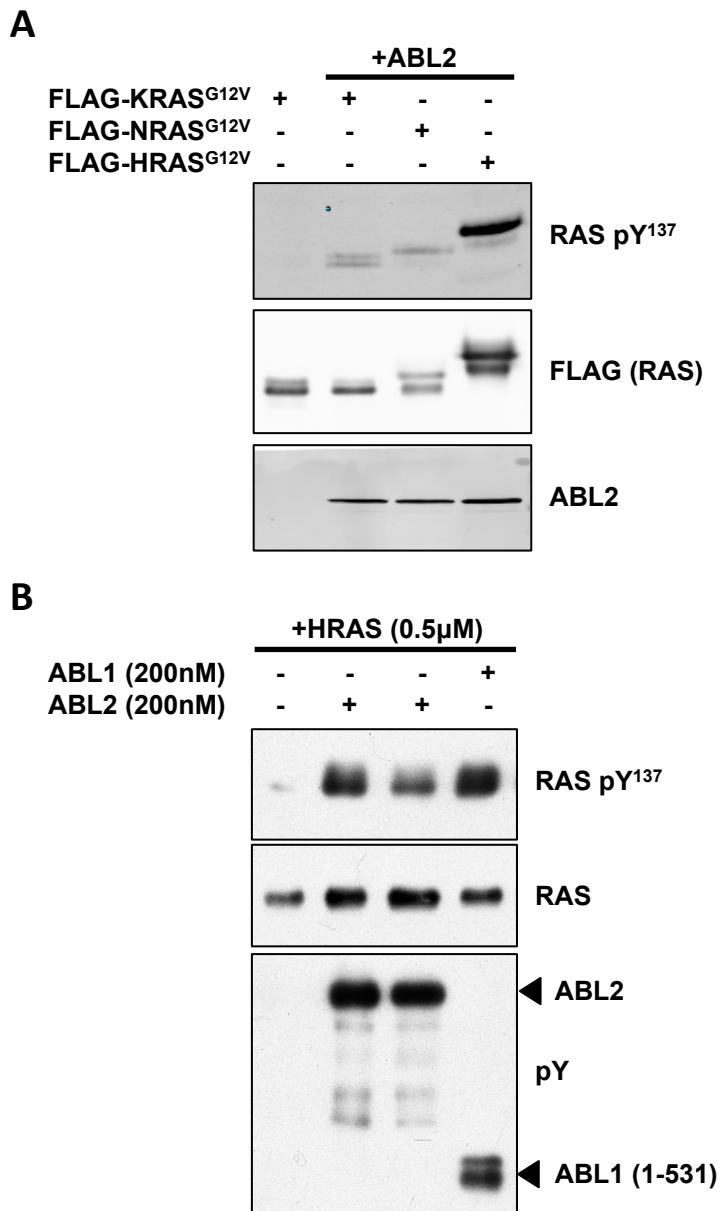

**Supplemental Figure 1.** All three RAS isoforms can be phosphorylated by ABL, and both ABL isoforms can phosphorylate HRAS. (A) 293T cells were transfected with ABL2 and FLAG-tagged KRAS<sup>G12V</sup>, NRAS<sup>G12V</sup> or HRAS<sup>G12V</sup>. (B) In vitro kinase assay with 0.5 μM HRAS and 200 nM ABL1(1-531) or ABL2.
